# Supplementary material for: Amphibian Metacommunity Responses to Agricultural Intensification in a Mediterranean Landscape
Source: MDPI journal article supplement (doi:10.3390/land10090924), 2021-09-02
Supplement: s1 [file s1]

## **Supplementary Material “Amphibian metacommunity responses to agricultural intensification in a Mediterranean landscape”**

Luis Albero<sup>a,1</sup>, Íñigo Martínez-Solano<sup>b</sup>, Ana Arias<sup>c</sup>, Miguel Lizana<sup>c</sup>, Eloy Bécares<sup>a</sup>.

<sup>a</sup> Área de Ecología, Departamento de Biodiversidad y Gestión Ambiental, Facultad de Ciencias Biológicas, Universidad de León (ULE). Callejón Campus Vegazana s/n, 24071 León, Spain. <sup>1</sup>: [lalbm@unileon.es](mailto:lalbm@unileon.es)

<sup>b</sup> Museo Nacional de Ciencias Naturales (MNCN-CSIC), c/ José Gutiérrez Abascal, 2, 28006 Madrid, Spain.

<sup>c</sup> Departamento de Biología Animal (Zoología), Facultad de Biología, Facultad de Ciencias Agrarias y Ambientales. Universidad de Salamanca 37007 Salamanca, Spain

**Table S1:** Location of the sampled 32 ponds and agricultural management groups (Datum: WGS84).

| Pond name             | Zone | Coord. X | Coord. Y | Agriculture |
|-----------------------|------|----------|----------|-------------|
| COSTRAMILLAS          | 30T  | 311920   | 4703041  | Irrigated   |
| CABRAS I              | 30T  | 316867   | 4701123  | Irrigated   |
| CABRAS III            | 30T  | 317207   | 4701357  | Irrigated   |
| CAL                   | 30T  | 306355   | 4699511  | Irrigated   |
| CARRILLÓN             | 30T  | 308242   | 4702330  | Irrigated   |
| CASTELLANA            | 30T  | 306701   | 4700902  | Irrigated   |
| CIMERA                | 30T  | 309848   | 4706650  | Irrigated   |
| DIEL                  | 30T  | 313612   | 4710654  | Irrigated   |
| ENTREVALLES           | 30T  | 313879   | 4703374  | Irrigated   |
| ESPINO                | 30T  | 316442   | 4704360  | Irrigated   |
| ESTORRUBIO            | 30T  | 318432   | 4703794  | Irrigated   |
| IBAÑEZ                | 30T  | 307434   | 4697693  | Irrigated   |
| MAYOR                 | 30T  | 316571   | 4706972  | Irrigated   |
| REDOS                 | 30T  | 317456   | 4704938  | Irrigated   |
| TILLO                 | 30T  | 315608   | 4702306  | Irrigated   |
| VILLIDÁN              | 30T  | 309844   | 4701302  | Irrigated   |
| CAMPOLAGUNAS          | 30T  | 324203   | 4114970  | Rainfed     |
| CANTOS                | 30T  | 315526   | 4711367  | Rainfed     |
| COTICO I              | 30T  | 319609   | 4710950  | Rainfed     |
| COTICO II             | 30T  | 319380   | 4710698  | Rainfed     |
| DEL MONTE I           | 30T  | 322621   | 4710753  | Rainfed     |
| ERA                   | 30T  | 320419   | 4716020  | Rainfed     |
| GENTE                 | 30T  | 317335   | 4714895  | Rainfed     |
| LAGUNETAS SENTIZ      | 30T  | 319012   | 4714347  | Rainfed     |
| POZO AGUJA            | 30T  | 320965   | 4715612  | Rainfed     |
| QUINTANA              | 30T  | 324633   | 4715945  | Rainfed     |
| REGUERO DE LA RAYA    | 30T  | 328000   | 4714338  | Rainfed     |
| RUEDA                 | 30T  | 318399   | 4711455  | Rainfed     |
| SENTIZ                | 30T  | 318796   | 4713892  | Rainfed     |
| TIERRAS DE VALDEARCOS | 30T  | 316172   | 4710420  | Rainfed     |
| TRIGO/RAQUETA         | 30T  | 319787   | 4712531  | Rainfed     |
| VELAZA                | 30T  | 319047   | 4706521  | Rainfed     |

**Table S2:** Pearson's correlation between environmental variables from sampled ponds. In brown, removed variables due to high correlation. Local variables are AREA: pond area (m<sup>2</sup>), MXDE: maximum pond depth on all visits (cm), MEDE: medium pond depth on all visits (cm), HECO: proportion of helophyte cover over pond area (0-1). Landscape variables (proportion of surface on a 500m or 1000m buffer around the pond) are ARTR: man-made forest, poplar or pine, GRA: grasslands, WET: wetlands other than the sampled pond, NTTR: natural oak forest, ART: artificial surfaces, BAR: bare ground, SCR: scrublands.

|          | AREA     | MXDE     | MEDE     | HECO     | ARTR1000 | NTTR1000 | ART1000  | BAR1000      | GRA1000  | WET1000     | SCR1000     | IRR1000     | NIR1000      |
|----------|----------|----------|----------|----------|----------|----------|----------|--------------|----------|-------------|-------------|-------------|--------------|
| AREA     | 1        | 0,372983 | 0,383416 | 0,185965 | -0,07667 | -0,08468 | -0,00151 | -0,091890459 | -0,01934 | 0,08248672  | -0,04609243 | 0,02636905  | 0,062320603  |
| MXDE     | 0,372983 | 1        | 0,973314 | 0,393733 | 0,15148  | -0,01602 | 0,22637  | 0,090782333  | 0,058836 | -0,02910589 | 0,26336654  | 0,08518281  | -0,229295207 |
| MEDE     | 0,383416 | 0,973314 | 1        | 0,363234 | 0,152251 | -0,01358 | 0,244544 | 0,131738244  | 0,109705 | -0,03147541 | 0,26263803  | 0,06655423  | -0,266309797 |
| HECO     | 0,185965 | 0,393733 | 0,363234 | 1        | 0,066597 | 0,071001 | 0,206607 | -0,101100483 | -0,06592 | -0,11619421 | 0,14095138  | -0,00527114 | -0,077458019 |
| ARTR1000 | -0,07667 | 0,15148  | 0,152251 | 0,066597 | 1        | 0,051506 | -0,04652 | 0,418464774  | 0,033418 | -0,01347783 | 0,20854553  | -0,20054936 | -0,007244315 |
| NTTR1000 | -0,08468 | -0,01602 | -0,01358 | 0,071001 | 0,051506 | 1        | -0,13424 | 0,458213583  | -0,17346 | -0,16847975 | 0,08266622  | -0,26449559 | -0,400297225 |
| ART1000  | -0,00151 | 0,22637  | 0,244544 | 0,206607 | -0,04652 | -0,13424 | 1        | 0,094845833  | -0,27029 | 0,02273015  | 0,09749607  | 0,29202179  | -0,347530684 |
| BAR1000  | -0,09189 | 0,090782 | 0,131738 | -0,1011  | 0,418465 | 0,458214 | 0,094846 | 1            | 0,103251 | -0,06027361 | 0,2880474   | -0,28397909 | -0,344187653 |
| GRA1000  | -0,01934 | 0,058836 | 0,109705 | -0,06592 | 0,033418 | -0,17346 | -0,27029 | 0,103251005  | 1        | -0,06961191 | 0,23897905  | -0,4274637  | -0,209265487 |
| WET1000  | 0,082487 | -0,02911 | -0,03148 | -0,11619 | -0,01348 | -0,16848 | 0,02273  | -0,060273613 | -0,06961 | 1           | 0,02590054  | 0,06078158  | -0,049938072 |
| SCR1000  | -0,04609 | 0,263367 | 0,262638 | 0,140951 | 0,208546 | 0,082666 | 0,097496 | 0,2880474    | 0,238979 | 0,02590054  | 1           | -0,14364468 | -0,266483104 |
| IRR1000  | 0,026369 | 0,085183 | 0,066554 | -0,00527 | -0,20055 | -0,2645  | 0,292022 | -0,283979087 | -0,42746 | 0,06078158  | -0,14364468 | 1           | -0,370028165 |
| NIR1000  | 0,062321 | -0,2293  | -0,26631 | -0,07746 | -0,00724 | -0,4003  | -0,34753 | -0,344187653 | -0,20927 | -0,04993807 | -0,2664831  | -0,37002816 | 1            |
| ARTR500  | -0,08002 | 0,003048 | 0,050617 | -0,02255 | 0,638183 | 0,130775 | 0,114912 | 0,659686521  | 0,16193  | 0,01889173  | 0,36117488  | -0,15692628 | -0,267009663 |
| NTTR500  | -0,10989 | -0,06712 | -0,06222 | -0,00082 | 0,005948 | 0,921155 | -0,13925 | 0,373196096  | -0,07481 | -0,15334274 | 0,10409169  | -0,31703031 | -0,366099463 |
| ART500   | -0,06076 | 0,129525 | 0,158448 | 0,176585 | 0,018657 | -0,03133 | 0,907448 | 0,212262849  | -0,18159 | 0,02543235  | 0,07764428  | 0,07212716  | -0,291577013 |
| BAR500   | -0,03055 | 0,062258 | 0,109692 | -0,00806 | 0,521125 | 0,314745 | 0,088505 | 0,885044039  | 0,098868 | -0,15817159 | 0,27317107  | -0,24623479 | -0,238475515 |
| GRA500   | 0,131452 | 0,265632 | 0,327017 | 0,117281 | -0,10005 | -0,04559 | -0,33165 | -0,065668685 | 0,71822  | -0,17722908 | 0,21639174  | -0,36011957 | -0,072708511 |
| WET500   | 0,285818 | 0,063474 | 0,08304  | 0,123801 | 0,009393 | -0,11369 | -0,04652 | -0,254291944 | 0,045079 | 0,64004213  | -0,04680859 | 0,05333767  | -0,079841411 |
| SCR500   | -0,0539  | 0,331604 | 0,294719 | 0,151511 | 0,174197 | 0,066982 | 0,048905 | 0,278934211  | 0,244728 | -0,07005118 | 0,81815654  | -0,11541763 | -0,231061025 |
| IRR500   | -0,03303 | -0,01141 | -0,04862 | -0,03696 | -0,21781 | -0,16968 | 0,251065 | -0,204676977 | -0,40569 | 0,03135016  | -0,0783377  | 0,88605247  | -0,351180356 |
| NIR500   | -0,03131 | -0,26503 | -0,30921 | -0,17341 | 0,178028 | -0,37239 | -0,26582 | -0,152750539 | -0,16535 | 0,09831985  | -0,28786703 | -0,30804748 | 0,800492538  |

Table S2 (2):

|          | ARTR500     | NTTR500     | ART500   | BAR500   | GRA500   | WET500   | SCR500   | IRR500       | NIR500   |
|----------|-------------|-------------|----------|----------|----------|----------|----------|--------------|----------|
| AREA     | -0,08001727 | -0,10988711 | -0,06076 | -0,03055 | 0,131452 | 0,285818 | -0,0539  | -0,033029651 | -0,03131 |
| MXDE     | 0,003048293 | -0,06712035 | 0,129525 | 0,062258 | 0,265632 | 0,063474 | 0,331604 | -0,011409726 | -0,26503 |
| MEDE     | 0,050616793 | -0,06221951 | 0,158448 | 0,109692 | 0,327017 | 0,08304  | 0,294719 | -0,048621089 | -0,30921 |
| HECO     | -0,02254761 | -0,00082159 | 0,176585 | -0,00806 | 0,117281 | 0,123801 | 0,151511 | -0,036964268 | -0,17341 |
| ARTR1000 | 0,638183021 | 0,005947945 | 0,018657 | 0,521125 | -0,10005 | 0,009393 | 0,174197 | -0,21780988  | 0,178028 |
| NTTR1000 | 0,130774858 | 0,921154786 | -0,03133 | 0,314745 | -0,04559 | -0,11369 | 0,066982 | -0,16968311  | -0,37239 |
| ART1000  | 0,114911677 | -0,13924519 | 0,907448 | 0,088505 | -0,33165 | -0,04652 | 0,048905 | 0,251064635  | -0,26582 |
| BAR1000  | 0,659686521 | 0,373196096 | 0,212263 | 0,885044 | -0,06567 | -0,25429 | 0,278934 | -0,204676977 | -0,15275 |
| GRA1000  | 0,161930098 | -0,07481227 | -0,18159 | 0,098868 | 0,71822  | 0,045079 | 0,244728 | -0,40568822  | -0,16535 |
| WET1000  | 0,018891731 | -0,15334274 | 0,025432 | -0,15817 | -0,17723 | 0,640042 | -0,07005 | 0,031350158  | 0,09832  |
| SCR1000  | 0,361174878 | 0,104091692 | 0,077644 | 0,273171 | 0,216392 | -0,04681 | 0,818157 | -0,078337697 | -0,28787 |
| IRR1000  | -0,15692628 | -0,31703031 | 0,072127 | -0,24623 | -0,36012 | 0,053338 | -0,11542 | 0,886052471  | -0,30805 |
| NIR1000  | -0,26700966 | -0,36609946 | -0,29158 | -0,23848 | -0,07271 | -0,07984 | -0,23106 | -0,351180356 | 0,800493 |
| ARTR500  | 1           | 0,098298266 | 0,150319 | 0,790665 | -0,08187 | 0,026605 | 0,231674 | -0,189181292 | -0,03256 |
| NTTR500  | 0,098298266 | 1           | -0,04356 | 0,21579  | -0,02684 | -0,12271 | 0,115185 | -0,270420788 | -0,33229 |
| ART500   | 0,150318532 | -0,04355714 | 1        | 0,181705 | -0,30738 | -0,08087 | 0,029129 | 0,068790908  | -0,22204 |
| BAR500   | 0,790664868 | 0,215789828 | 0,181705 | 1        | -0,09511 | -0,21069 | 0,174311 | -0,176772039 | -0,0638  |
| GRA500   | -0,08187128 | -0,02684185 | -0,30738 | -0,09511 | 1        | 0,033643 | 0,239451 | -0,406984071 | -0,34758 |
| WET500   | 0,026604648 | -0,12270687 | -0,08087 | -0,21069 | 0,033643 | 1        | -0,04188 | 0,00712565   | -0,10094 |
| SCR500   | 0,231673747 | 0,115185255 | 0,029129 | 0,174311 | 0,239451 | -0,04188 | 1        | -0,074937194 | -0,28792 |
| IRR500   | -0,18918129 | -0,27042079 | 0,068791 | -0,17677 | -0,40698 | 0,007126 | -0,07494 | 1            | -0,39219 |
| NIR500   | -0,03256228 | -0,33229299 | -0,22204 | -0,0638  | -0,34758 | -0,10094 | -0,28792 | -0,39219131  | 1        |

**Table S3:** Means and range of values for environmental variables recorded in ponds in the two agricultural management areas, with statistical significance of differences between irrigated and rainfed groups assessed with Mann-Whitney tests. Variable names as in table S2.

|                       | AREA                 | MEDE           | HECO            | ARTR1000      | GRA1000            | WET1000           | NTTR500            | ART500             | BAR500        | SCR500        | IRR500         | NIR500              |
|-----------------------|----------------------|----------------|-----------------|---------------|--------------------|-------------------|--------------------|--------------------|---------------|---------------|----------------|---------------------|
| <b>Rainfed</b>        | 8763,1 (42201-1360)  | 79,27 (140-35) | 28,06 (68,6-0)  | 1,28 (7,48-0) | 25,42 (45,7-7,56)  | 1,76 (9,93-0)     | 11,47 (50,11-0,29) | 7,50 (23,35-2,08)  | 0,71 (4,28-0) | 0,61 (3,6-0)  | 3,19 (8,11-0)  | 45,34 (78,18-2,19)  |
| <b>Irrigated</b>      | 8339,31 (19441-1139) | 68,36 (130-35) | 32,50 (82,27-0) | 0,18 (0,66-0) | 18,33 (31,08-6,42) | 1,84 (10,52-0,30) | 0,65 (5,25-0)      | 11,41 (19,47-6,23) | 0,03 (0,25-0) | 0,08 (6,31-0) | 20,61 (64,5-0) | 46,38 (72,29-13,71) |
| <b>Difference</b>     | 423,81               | 10,91          | -4,43           | 1,10          | 7,10               | -0,09             | 10,81              | -3,91              | 0,68          | 0,53          | -17,43         | -1,04               |
| <b>% difference</b>   | 4,84                 | 13,77          | -15,80          | 86,11         | 27,92              | -4,97             | 94,29              | -52,07             | 96,38         | 87,56         | -547,10        | -2,29               |
| <b>Mann-Withney U</b> | 138                  | 103            | 137             | 73            | 80                 | 159               | 21                 | 201                | 46            | 62            | 213,5          | 133                 |
| <b>p-value</b>        | 0,72                 | 0,35           | 0,75            | 0,039*        | 0,073              | 0,25              | 0,000056*          | 0,0051*            | 0,00086*      | 0,0099*       | 0,0014*        | 0,87                |

Local scale: pond area in m<sup>2</sup> (AREA); medium pond depth in cm (MEDE); helophyte cover in % pond area (HECO). In % cover at a 1000-m scale from the pond: man-made forest, poplar or pine (ARTR); grasslands (GRA1000); wetlands (WET1000). In % cover at a 500-m scale from the pond: natural oak forest (NTTR500), artificial surfaces (ART500), bare ground (BAR500), scrub (SCR500), irrigated crops (IRR500), and rainfed crops (NIR500). \*: Significant under  $\alpha=0,05$ . NA: Non-applicable

**Table S4:** Environmental variables summarized via Principal Components Analysis (PCA) showing the scores for each principal component (PC) and environmental variable.

|               | PC1         | PC2          | PC3          | PC4         | PC5          | PC6          |
|---------------|-------------|--------------|--------------|-------------|--------------|--------------|
| <b>EIGEN</b>  | 2,745       | 1,855        | 1,709        | 1,402       | 1,24         | 1,048        |
| <b>CUM PR</b> | 0,211       | 0,353        | 0,485        | 0,593       | 0,688        | 0,769        |
| AREA          | 0,27        | <b>-0,63</b> | <b>0,64</b>  | -0,05       | 0,18         | 0,07         |
| MEDE          | <b>0,91</b> | -0,58        | 0,27         | 0,09        | -0,09        | 0,10         |
| HECO          | 0,50        | -0,47        | 0,15         | 0,01        | <b>0,58</b>  | 0,31         |
| ARTR1000      | 0,49        | 0,37         | -0,04        | <b>0,74</b> | -0,15        | 0,54         |
| GRA1000       | <b>0,89</b> | 0,12         | 0,44         | -0,22       | -0,15        | -0,53        |
| WET1000       | -0,32       | -0,03        | 0,28         | 0,36        | <b>-0,59</b> | <b>-0,63</b> |
| NTTR500       | 0,21        | 0,57         | -0,57        | -0,47       | 0,52         | -0,20        |
| ART500        | -0,07       | -0,55        | -0,58        | <b>0,72</b> | 0,20         | -0,42        |
| BAR500        | 0,58        | 0,26         | -0,51        | <b>0,62</b> | 0,19         | -0,10        |
| SCR500        | <b>0,92</b> | 0,09         | -0,13        | 0,00        | -0,22        | -0,21        |
| IRR500        | -0,39       | <b>-0,80</b> | <b>-0,60</b> | -0,15       | -0,49        | 0,29         |
| NIR500        | -0,55       | 0,52         | <b>0,72</b>  | 0,50        | 0,12         | 0,18         |

EIGEN: Eigenvalues for each of the Principal Components; CUM PR: Cumulative proportion explained of the environmental variation by the PCs.

Interpretation of the PCs:

PC1: High values indicate deep ponds in heterogeneous landscapes with high cover of natural vegetation and low cover of crops.

PC2: High values correspond to large ponds in landscapes with low cover of irrigated crops.

PC3: This PC is similar to PC2 but corresponds to landscapes dominated by rainfed crops and grasslands.

PC4: High values correspond to ponds in semi-humanized landscapes with tree plantations, urban areas, rainfed crops and bare soil.

PC5: High values correspond to shaded ponds (high helophyte cover) in landscapes with low wetland cover.

PC6: High values correspond to isolated ponds (low wetland cover).

**Table S5:** Occurrences of amphibian species (number and proportion of occupied ponds) in irrigated vs. rainfed ponds. Statistical significance of differences was assessed by means of Fisher's test.

|                  | <i>P. waltl</i> | <i>T. marmoratus</i> | <i>P. cultripes</i> | <i>D. galganoi</i> | <i>B. spinosus</i> | <i>E. calamita</i> | <i>H. molleri</i> | <i>P. perezi</i> |
|------------------|-----------------|----------------------|---------------------|--------------------|--------------------|--------------------|-------------------|------------------|
| <b>Irrigated</b> | 10 (0.62)       | 14 (0.87)            | 8 (0.5)             | 0 (0)              | 1 (0.62)           | 6 (0.37)           | 13 (0.81)         | 11 (0.68)        |
| <b>Rainfed</b>   | 14 (0.87)       | 14 (0.87)            | 15 (0.93)           | 5 (0.31)           | 4 (0.25)           | 6 (0.37)           | 16 (1)            | 15 (0.93)        |
| <b>All ponds</b> | 24 (0.75)       | 28 (0.87)            | 23 (0.72)           | 5 (0.16)           | 5 (0.16)           | 12 (0.37)          | 29 (0.9)          | 26 (0.81)        |
| <b>Fisher p</b>  | 0,22            | NA                   | 0,015*              | 0,043*             | 0,33               | NA                 | 0,23              | 0,17             |

\*: Significant under  $\alpha=0,05$ . NA: non-applicable.

**Table S6:** Results of the SIMPER analysis between irrigated and rainfed pond communities.

|                              | Average | sd     | Ratio | Av.Ab. Irrigated | Av.Ab. Rainfed | Cum. Contr. | p          |
|------------------------------|---------|--------|-------|------------------|----------------|-------------|------------|
| <i>Pelobates cultripes</i>   | 0.0593  | 0.0620 | 0.956 | 0.5000           | 0.938          | 0.191       | 0.0139 *   |
| <i>Epidalea calamita</i>     | 0.0497  | 0.0551 | 0.902 | 0.3750           | 0.375          | 0.351       | 0.9930     |
| <i>Pleurodeles waltl</i>     | 0.0469  | 0.0584 | 0.804 | 0.6250           | 0.875          | 0.502       | 0.3372     |
| <i>Pelophylax perezi</i>     | 0.0433  | 0.0622 | 0.695 | 0.6875           | 0.938          | 0.641       | 0.1700     |
| <i>Discoglossus galganoi</i> | 0.0304  | 0.0461 | 0.660 | 0.0000           | 0.312          | 0.739       | 0.0010 *** |
| <i>Bufo spinosus</i>         | 0.0278  | 0.0453 | 0.614 | 0.0625           | 0.250          | 0.829       | 0.0655 **  |
| <i>Triturus marmoratus</i>   | 0.0266  | 0.0521 | 0.511 | 0.8750           | 0.875          | 0.915       | 0.9967     |
| <i>Hyla molleri</i>          | 0.0265  | 0.0561 | 0.473 | 0.8125           | 1.000          | 1.000       | 0.7092     |

Sd: Standard deviation. Av.Ab.: Average Abundance. Cum.Contr.: Cumulative contribution. Significance codes: 0 '\*\*\*' 0.001 '\*\*' 0.01 '\*' 0.05 '.' 0.1 ' ' 1



**Table S7:** Abundances of amphibian species (individuals/1000 m<sup>2</sup>) in irrigated vs. rainfed ponds. Statistical significance of differences between the two agricultural areas was assessed with ANOSIM test.

|                       | <i>P. waltl</i> | <i>T. marmoratus</i> | <i>P. cultripes</i> | <i>D. galganoi</i> | <i>B. spinosus</i> | <i>E. calamita</i> | <i>H. molleri</i> |
|-----------------------|-----------------|----------------------|---------------------|--------------------|--------------------|--------------------|-------------------|
| <b>Mean irrigated</b> | 0,82            | 1,22                 | 0,46                | 0,00               | 0,01               | 0,63               | 3,32              |
| <b>Mean rainfed</b>   | 1,35            | 1,13                 | 1,15                | 0,10               | 0,12               | 0,63               | 2,97              |
| <b>Mean overall</b>   | 1,08            | 1,18                 | 0,81                | 0,05               | 0,06               | 0,63               | 3,15              |
| <b>ANOSIM R</b>       | -0,01           | -0,008               | 0,04                | NA                 | 0,009              | -0,006             | 0,016             |
| <b>p-value</b>        | 0,54            | 0,45                 | 0,11                | NA                 | 0,15               | 0,45               | 0,22              |

\*: Significant under  $\alpha=0,05$ . NA: Non-applicable

**Table S8:** Results of the logistic regression analysis for amphibian species presence using all ponds and summarizing environmental variables via PCA. Estimates are shown along with significance.

|                      | INTERCEPT | PC1    | PC2   | PC3   | PC4    | PC5    | PC6    |
|----------------------|-----------|--------|-------|-------|--------|--------|--------|
| <i>P. waltl</i>      | 3,19*     | 2,56   | 2,39" | -1,65 | 2,99   | -      | 4,6"   |
| <i>T. marmoratus</i> | 2,93**    | 1,98   | -     | -     | 1,89   | -      | -      |
| <i>D. galganoi</i>   | -3,85*    | 2,52*  | -     | 1,98  | -      | -      | -      |
| <i>P. cultripes</i>  | 3,15*     | 3,9"   | 2,46* | -     | -2,46" | -2,46" | -2,11" |
| <i>E. calamita</i>   | -0,76     | -1,27" | 0,89  | -     | -      | -1,07" | -      |
| <i>B. spinosus</i>   | -2,96*    | !      | -     | 1,65" | -      | -2,26  | 1,77"  |
| <i>H. molleri</i>    | 6,94      | !      | !     | -1,75 | -      | -3,75  | 5,68   |
| <i>P. perezi</i>     | 5,50*     | 2,15   | -     | -3,12 | -      | -3,55" | 5,13"  |

!: This PC was removed as a variable from the logistic models due to problems of perfect separation (p-values=0 or 1).

Significance codes: 0 '\*\*\*' 0.001 '\*\*' 0.01 '\*' 0.05 '.' 0.1 ' ' 1

Interpretation of the PCs (see table S4):

PC1: High values indicate deep ponds in heterogeneous landscapes with high cover of natural vegetation and low cover of crops.

PC2: High values correspond to large ponds in landscapes with low cover of irrigated crops.

PC3: This PC is similar to PC2 but corresponds to landscapes dominated by rainfed crops and grasslands.

PC4: High values correspond to ponds in semi-humanized landscapes with tree plantations, urban areas, rainfed crops and bare soil.

PC5: High values correspond to shaded ponds (high helophyte cover) in landscapes with low wetland cover.

PC6: High values correspond to isolated ponds (low wetland cover).
